# Supplementary material for: Telomere-associated proteins add deoxynucleotides to terminal proteins during replication of the telomeres of linear chromosomes and plasmids in Streptomyces
Source: PubMed Central journal article supplement (PMC4513846; doi:10.1093/nar/gkv302), 2015-04-16
Supplement: supp_gkv302_nar-00172-x-2015-File004.pdf [file supp_gkv302_nar-00172-x-2015-File004.pdf]

Table S1 PCR Primers for production of telomere DNA

| Product | Sequences                                                | Note                                                       |
|---------|----------------------------------------------------------|------------------------------------------------------------|
| Fig. 2A | ATAGAGGG <u>CCCGCGGAGCGGGTACCC</u><br>AGCGCAGCGGTCACCTCG | <i>Hae</i> III site underlined                             |
| Fig. 2B | <u>ACGCGTCGACCCGCGGAGCGGGTACCC</u><br>AGCGCAGCGGTCACCTCG | Overlapping <i>Mlu</i> I and <i>Sal</i> I sites underlined |
